# Supplementary material for: Variation of choroidal thickness during the waking period over three consecutive days in different degrees of myopia and emmetropia using optical coherence tomography
Source: PeerJ. 2023 May 4;11:e15317. doi: 10.7717/peerj.15317 (PMC10164371; doi:10.7717/peerj.15317)
Supplement: Supplemental Information 1 [file peerj-11-15317-s001.xlsx]

## Sheet: Sheet1
ID	SE	SFCT
		Day 1							Day 2							Day 3
		08:00:00	10:00:00	12:00:00	14:00:00	16:00:00	18:00:00	20:00:00	08:00:00	10:00:00	12:00:00	14:00:00	16:00:00	18:00:00	20:00:00	08:00:00	10:00:00	12:00:00	14:00:00	16:00:00	18:00:00	20:00:00
1	-8.5	141	140	141.5	143	134.5	137	138	141	143	138.5	140	141	140.5	136	143	139	147.5	145	141.5	139.5	142.5
2	-8	116.5	114.5	112.5	115.5	114.5	113.5	117	119	117.5	114.5	115	118.5	116.5	114.5	123.5	117	123	118	117	122.5	118.5
3	-7.875	168.5	164	164	161.5	164	163	164.5	161.5	165.5	165.5	165.5	162	161	164.5	164	164.5	159.5	166.5	162.5	161	166.5
4	-7.375	103	84.5	102.5	93.5	90	81.5	89.5	101	91	83	93	92	91	83	96	78	89.5	84	88.5	84.5	88.5
5	-7.25	126.5	123.5	120.5	120.5	122.5	122	129	124	120.5	123.5	119.5	123.5	122	126	121	120.5	122.5	121	120.5	121	124.5
6	-6.875	168	159.5	160.5	159.5	168	160.5	163	165.5	163.5	163	162	163.5	166	161	162.5	163	161	165	167	165	165
7	-6.75	222.5	218.5	210	217.5	210	219.5	208	212	204	210	227	214.5	203	202	212.5	197	211	218	216.5	206	209.5
8	-6.5	177.5	173	168	186	175	172.5	183.5	202	181	180.5	192	196	175	179	187	175	180	180	193	176.5	176
9	-6	294.5	294.5	287	291.5	288	291	285	283	283	283	282.5	285.5	281.5	283.5	288.5	288.5	283	285.5	282.5	285.5	286.5
10	-6	131.5	135	135	132.5	131	129.5	136.5	132.5	135.5	132	136.5	135	130	130	141	134	136.5	143	141.5	135.5	132.5
11	-6	124	120	113.5	117.5	125.5	122	117	111.5	113	117	119	115.5	112.5	115	120	121	119.5	123	119.5	115	118.5
12	-6	170.5	174	174	184	186	179	180	166.5	171	171	177.5	171.5	175	178	171.5	171	170	174.5	171	166.5	165
13	-6	214.5	207.5	218	222	223.5	221.5	209.5	210	219.5	226.5	223.5	228	209.5	216.5	214.5	218.5	223	225.5	212.5	204	213.5
14	-6	182	183	184	186.5	181	182.5	188	184.5	179.5	182.5	182.5	180.5	182	180	180.5	188	184.5	185	187.5	180	183
15	-5	195.5	192	184	194.5	184.5	189.5	191	199.5	194.5	193	197.5	195.5	192	199.5	204	193.5	192.5	194	194.5	193	189
16	-4.625	225.5	221	225	216	223	221.5	224.5	221	225.5	220.5	225.5	223.5	218	223.5	217.5	226.5	220.5	224.5	223	218.5	228.5
17	-4.6	166	166.5	168	169.5	171	167.5	169	166.5	165	165	165	166	163.5	164.5	166	168	166.5	169	163	164	163
18	-4.25	216.5	215	214	210.5	218.5	212.5	212.5	219.5	207	217.5	211	212	215	221	218	204.5	207	209	214	211.5	208
19	-4.125	179	180.5	179	174	173	170	177	178	171	178	174	174.5	172.5	171.5	174.5	178	179	175	176.5	176	169.5
20	-4	208	210	212.5	209	214.54	204	201.5	222	215.5	220	224.5	208	209.5	210.5	215	213	218	213	208	215.5	214
21	-3.875	255	252	248.5	257.5	253.5	255.5	248.5	257.5	255	251	249.5	255	255	254	256.5	250	251.5	250.5	250.5	255	256.5
22	-3.75	345	351	342.5	349.5	347	344	344.5	348.5	341	337.5	351.5	344.5	343.5	336	341	341.5	341	346.5	342	341	345
23	-3.375	210.5	208	204.5	220	210	212	214	220.5	214.5	210.5	220	213	205.5	212	217.5	211	208	218	209.5	215	204.5
24	-3.375	265.5	266	260	264	264.5	264.5	270	274	267	264.5	269	265	266	270	268	267.5	262.5	269.5	264	268.5	266.5
25	-3.375	233.5	228.5	236	232	235	235	234	234	231	232	234	232	229.5	233.5	233	236.5	239.5	240	236.5	237.5	240.5
26	-3.125	260.5	264	268	262.5	263.5	279.5	268.5	270.5	273.5	269	275	269	267.5	268	270.5	278	264	264	264	261	269.5
27	-3	308.5	308	311	309	310.5	304.5	313.5	313	316.5	309.5	310	310	306	311.5	304.5	304	301.5	309.5	317	309.5	314.5
28	-3	245.5	244	241	248	238	237	236	248	244.5	243	255	252.5	249.5	234	248	258	248.5	246	252.5	242	244
29	-3	233.5	225	221	227	224.5	222	228	239	232.5	226	242	232.5	236.5	231	241	242.5	245	242.5	232.5	238	235
30	-2.5	145	145	150.5	146	143	142	145	142.5	142.5	139.5	141.5	143	142	148.5	145	142.5	145	147.5	150	144	141.5
31	-2.375	245.5	240.5	242.5	239	247.5	243	247.5	242	245	240	238.5	238	241.5	238	242	238.5	241.5	240.5	243.5	242.5	238
32	-2.25	353	343	345	347	344.5	344.5	346.5	348.5	349.5	347.5	348	341.5	342.5	341	351	345.5	350.5	354.5	344.5	348.5	342.5
33	-2.125	284.5	285.5	285	285	275	285.5	285.5	290	292.5	291.5	290.5	285.5	282	291.5	288	294.5	285.5	283.5	292	289	291.5
34	-2.125	389	379	389	371.5	378.5	383.5	389.5	382.5	381	378.5	378.5	369	383.5	376	387.5	379.5	364.5	372	364.5	371	377
35	-2.125	328.5	325	326	324.5	325	323	325.5	326	324	325	330	323.5	322	328.5	326.5	333.5	332.5	330.5	327	328.5	324
36	-2.125	286	279	286	284	281	278.5	277	283.5	290	282.5	293.5	295.5	290	290.5	292	291.5	290	289.5	292	289	295
37	-2	278.5	283	278.5	283	284	280.5	275.5	279	277	279.5	276	273.5	273	276	283	272	279.5	274.5	271	275	278.5
38	-2	329	331	324.5	333.5	330.5	327	323.5	331	323	325	324	329.5	323.5	325	334	330	333.5	328.5	332	323.5	325
39	-2	233.5	225	222.5	229.5	226	227.5	228.5	225.5	222.5	224	228.5	227.5	225	231	225	237	237.5	236.5	232.5	230.5	233.5
40	-1.875	359	382	364	359	363	361	362	361	360	366	377	360.5	368	376.5	381.5	383	364	373	379	376	375.5
41	-1.875	282	275	275	281.5	276	276.5	277.5	278	274	277.5	273.5	273.5	269	271.5	278	276.5	274	277	276.5	276.5	282.5
42	-1.75	384.5	364	368.5	374.5	375	363.5	359	382.5	377.5	370	380	373.5	363.5	373.5	377.5	377.5	383.5	378	386	376	373.5
43	-1.625	340	326	324	334	340	340	342.5	333.5	340	334	340.5	337.5	332	333	342	333	337.5	336	331	330.5	339
44	-1.375	321	320	312.5	313.5	329	309	329	325.5	326	319	312	318	310.5	316	323	315.5	321	323	320.5	325.5	316.5
45	-1	276	287	277	276	271	258	276.5	279	274	276	279	269.5	277	275.5	278.5	278	279	272.5	267	273.5	273
46	-0.875	251	254	251.5	251	256	252.5	254.5	250.5	255.5	255.5	248.5	255	251	253.5	251	253	255.5	251.5	255.5	247	251.5
47	-0.625	275	272	271	285.5	285.5	280	280	295.5	285	280	285	276	280	275	295	287	280.5	291	278	291	290
48	-0.5	315	316.5	314	312	312	316	314.5	307.5	305.5	304	308.5	305	310.5	304.5	296.5	297	317	300	307.5	320	304.5
49	-0.5	186	174.5	173	178	173.5	172	178	179.5	174.5	180	182	180	172.5	181	178.5	174.5	175.5	171.5	170.5	172.5	173
50	-0.5	239	233.5	230.5	233.5	228	231	239	232	233	232	232.5	234	232.5	235.5	238	228	231.5	230	233	237	231.5
51	-0.375	400	396	403	402	405.5	413	402.5	400	410.5	371.5	378.5	382	389.5	385.5	403	428.5	405.5	420.5	420.5	430.5	425.5
52	0	270	267	273	271.5	267.5	276.5	276	292	286	281	283	277.5	285	281	282.5	291	279	288.5	281	282	279.5
53	0	345.5	363	362.5	390.5	375.5	366	372.5	366	362	373	370.5	358	375.5	356.5	368.5	368	344.5	371	350.5	356	368
54	0.125	297	289.5	293.5	292	289.5	288	293.5	321.5	319	307	323	304	303.5	305	308	304.5	307	307	300.5	304.5	301
55	0.125	354.5	364.5	353.5	353	368.5	368.5	362.5	344.5	358	354	353	349.5	352	354	344	343.5	352.5	360	360.5	354	352.5
56	0.125	330.5	340.5	338	349	338.5	336.5	340	334	332.5	334.5	329	327.5	328	334.5	337	341.5	343	345	340	340	349.5
57	0.5	425.5	473.5	428	467	460	487	460.5	425.5	449	477.5	465	484	467.5	474.5	463.5	465	485	502.5	451.5	461.5	454
58	0.5	166	162.5	160	152	158	165	155	156.5	157	154.5	154.5	150	155	150	152.5	150.5	152	152	145	147.5	150
59	0.5	303	303.5	311.5	316.5	307	311.5	320	309	314	322.5	320.5	312	310.5	308.5	323.5	321	318.5	320.5	325	316	316
60	0.5	273	274	268	269	267	260.5	266.5	267	267.5	257.5	267	266	265.5	265.5	256	253	252	251	259	262.5	262
